# Supplementary material for: A Pan-Cancer Analysis of Prognostic and Immunological Roles for Cell Death Genes
Source: MDPI journal article supplement (doi:10.3390/genes14061178), 2023-05-28
Supplement: s1 [file s1]

## *Supplementary Material*

### **Pan-cancer Analysis of Prognostic and Immunological Roles for Cell Death Genes**

**Ye Hong, Yan Yuan, Zekun Liu, Ze-Xian Liu, Yi-Zhuo Zhang**

**\* Correspondence:** Prof. Yi-Zhuo Zhang, Department of Pediatric Oncology, Sun Yat-sen University Cancer Center. 651 Dongfeng East Road, Guangzhou, Guangdong 510060, P. R. China. Tel: +86-20-87342466; Fax: +86-20-87343598; Email: zhangyzh@sysucc.org.cn; Prof. Ze-Xian Liu, State Key Laboratory of Oncology in South China, Collaborative Innovation Center for Cancer Medicine, Sun Yat-sen University Cancer Center, Guangzhou 510060, P. R. China. Tel: +86-20-87342466; Fax: +86-20-87343598; Email: liuzx@sysucc.org.cn.

#### **1     Supplementary Figures and Tables**

## 1.1 Supplementary Figures

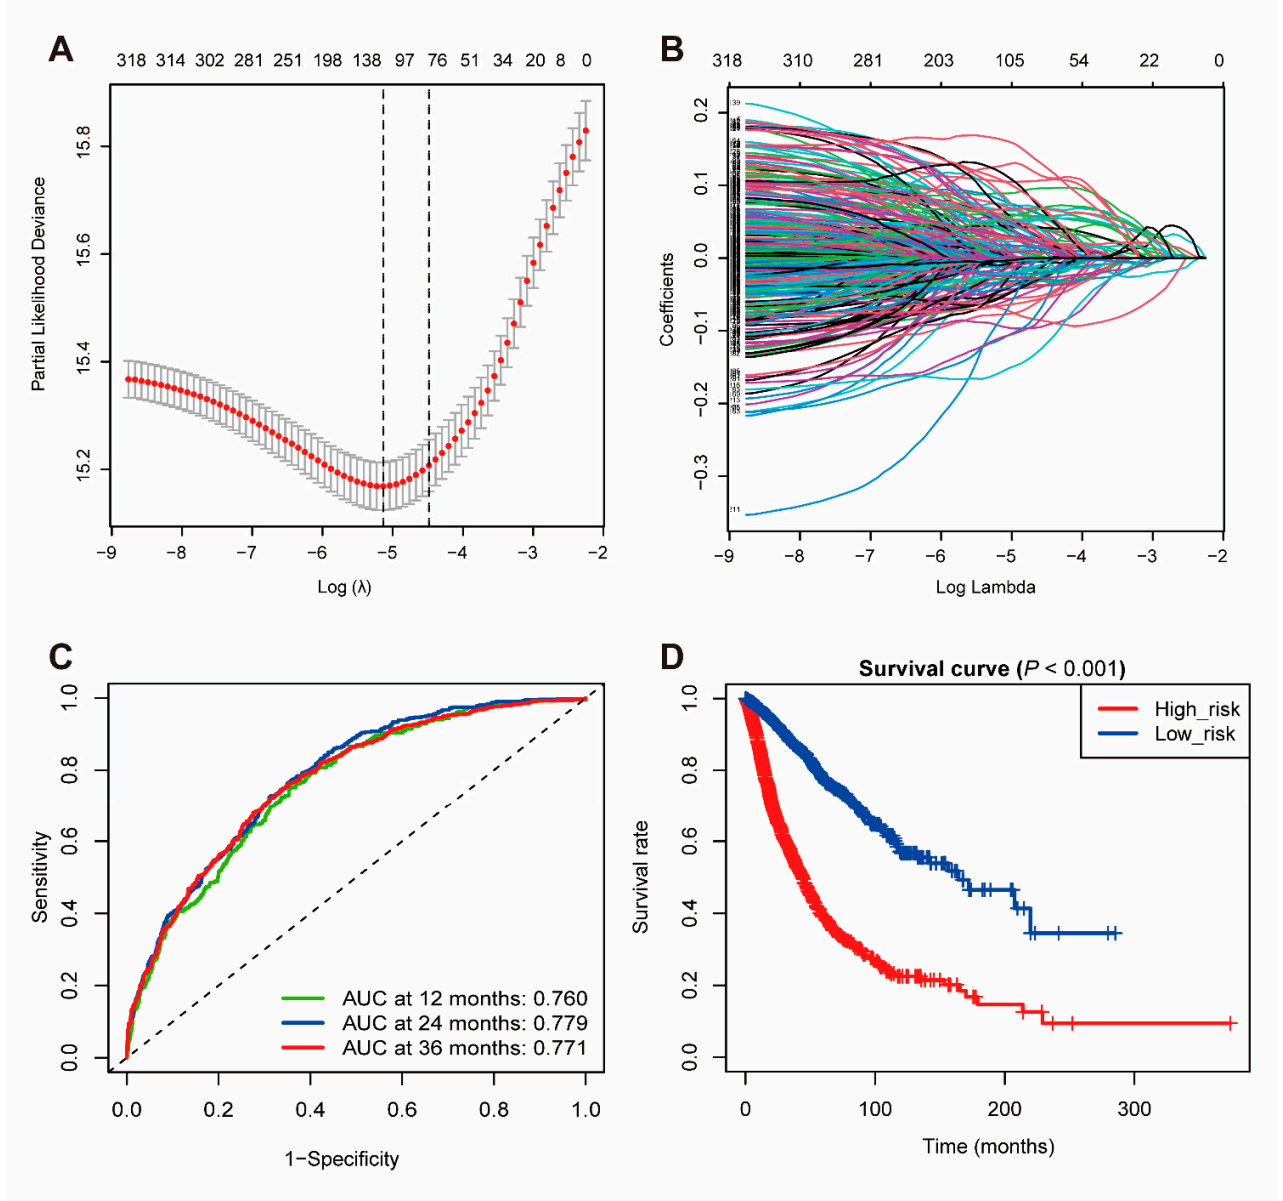

**Supplementary Figure S1.** Constructing and validating of overall survival associated programmed cell death signature - PAGscore. A, B) LASSO analysis showed 107 genes were most survival-related genes; C) ROC analysis showed PAGscore could effectively predict the 12-, 24- and 36-month overall survival rate of patients in validation cohort; D) Survival analysis showed the overall survival of high-risk patients with higher PAGscore was worse than low risk patients with lower PAGscore in validation cohort.

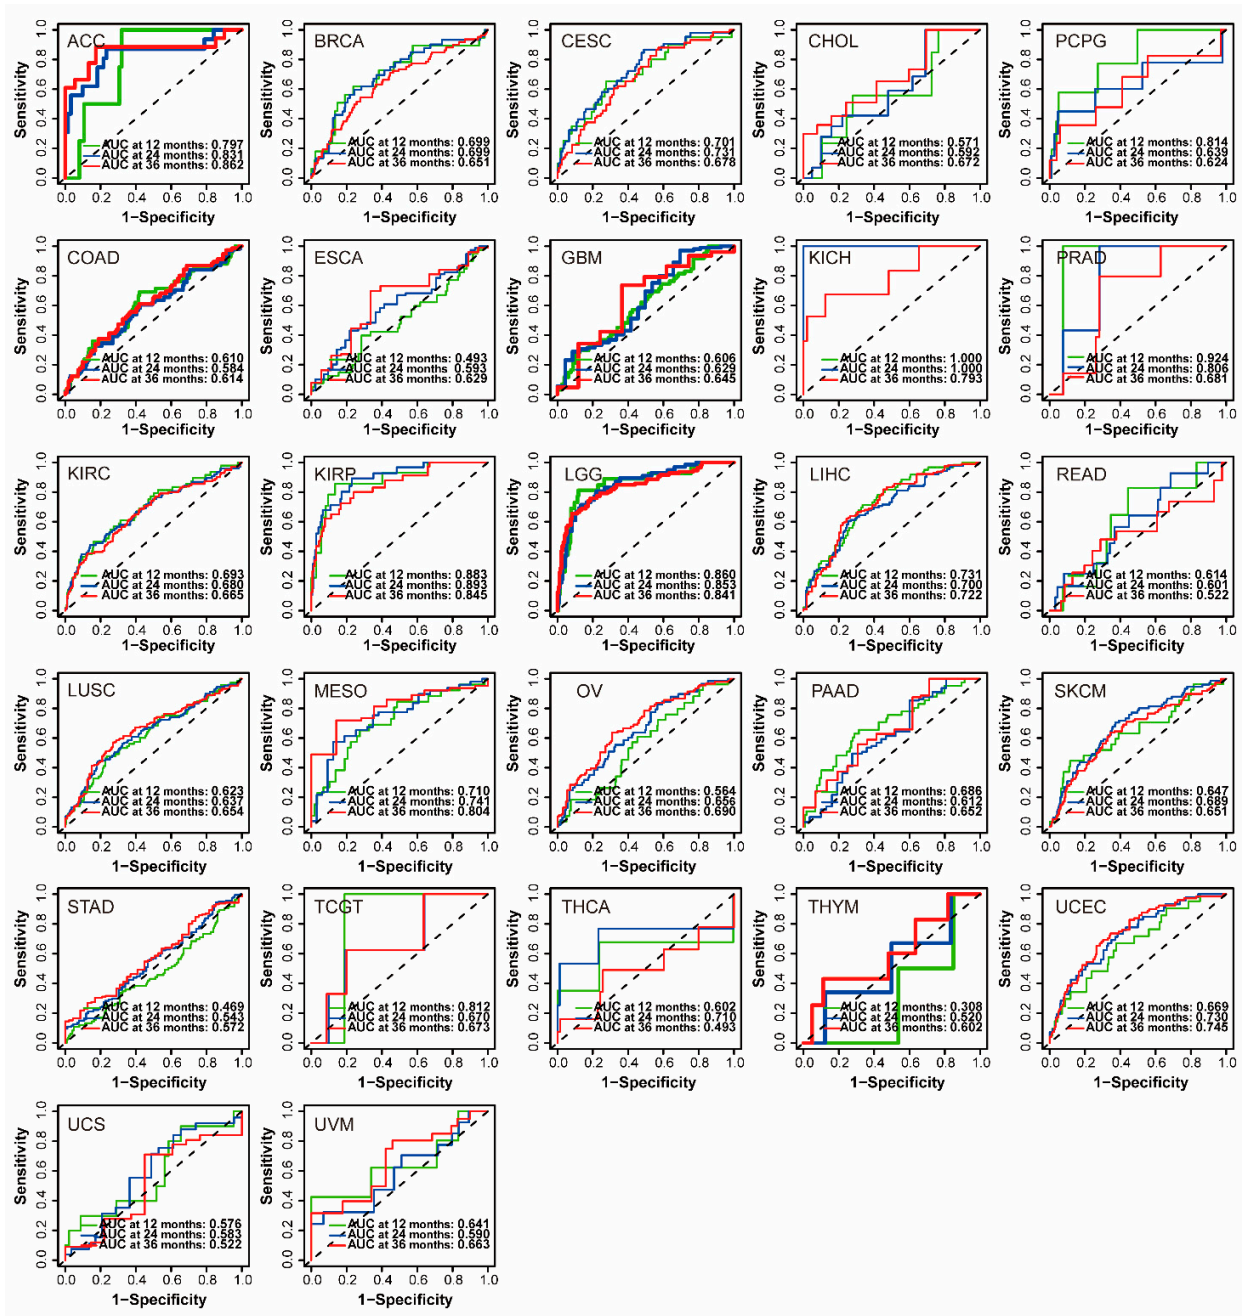

**Supplementary Figure S2.** ROC analysis of survival-predictive performance of PAGScore in different human cancers. Abbreviations: ACC, adrenocortical carcinoma; BRCA, breast invasive carcinoma; CESC, cervical squamous cell carcinoma and endocervical adenocarcinoma; CHOL, cholangiocarcinoma; PCPG, pheochromocytoma and paraganglioma; COAD, colon adenocarcinoma; ESCA, esophageal carcinoma; GBM, glioblastoma multiforme; KICH, kidney chromophobe; PRAD, prostate adenocarcinoma;

KIRC, kidney renal clear cell carcinoma; KIRP, kidney renal papillary cell carcinoma; LGG, brain lower grade glioma; LIHC, liver hepatocellular carcinoma; READ, rectum adenocarcinoma; LUSC, lung squamous cell carcinoma; MESO, mesothelioma; OV, ovarian serous cystadenocarcinoma; PAAD, pancreatic adenocarcinoma; SKCM, skin cutaneous melanoma; STAD, stomach adenocarcinoma; TCGT, testicular germ cell tumors; THCA, thyroid carcinoma; THYM, thymoma; UCEC, uterine corpus endometrial carcinoma; USC, uterine carcinosarcoma; UVM, uveal melanoma.

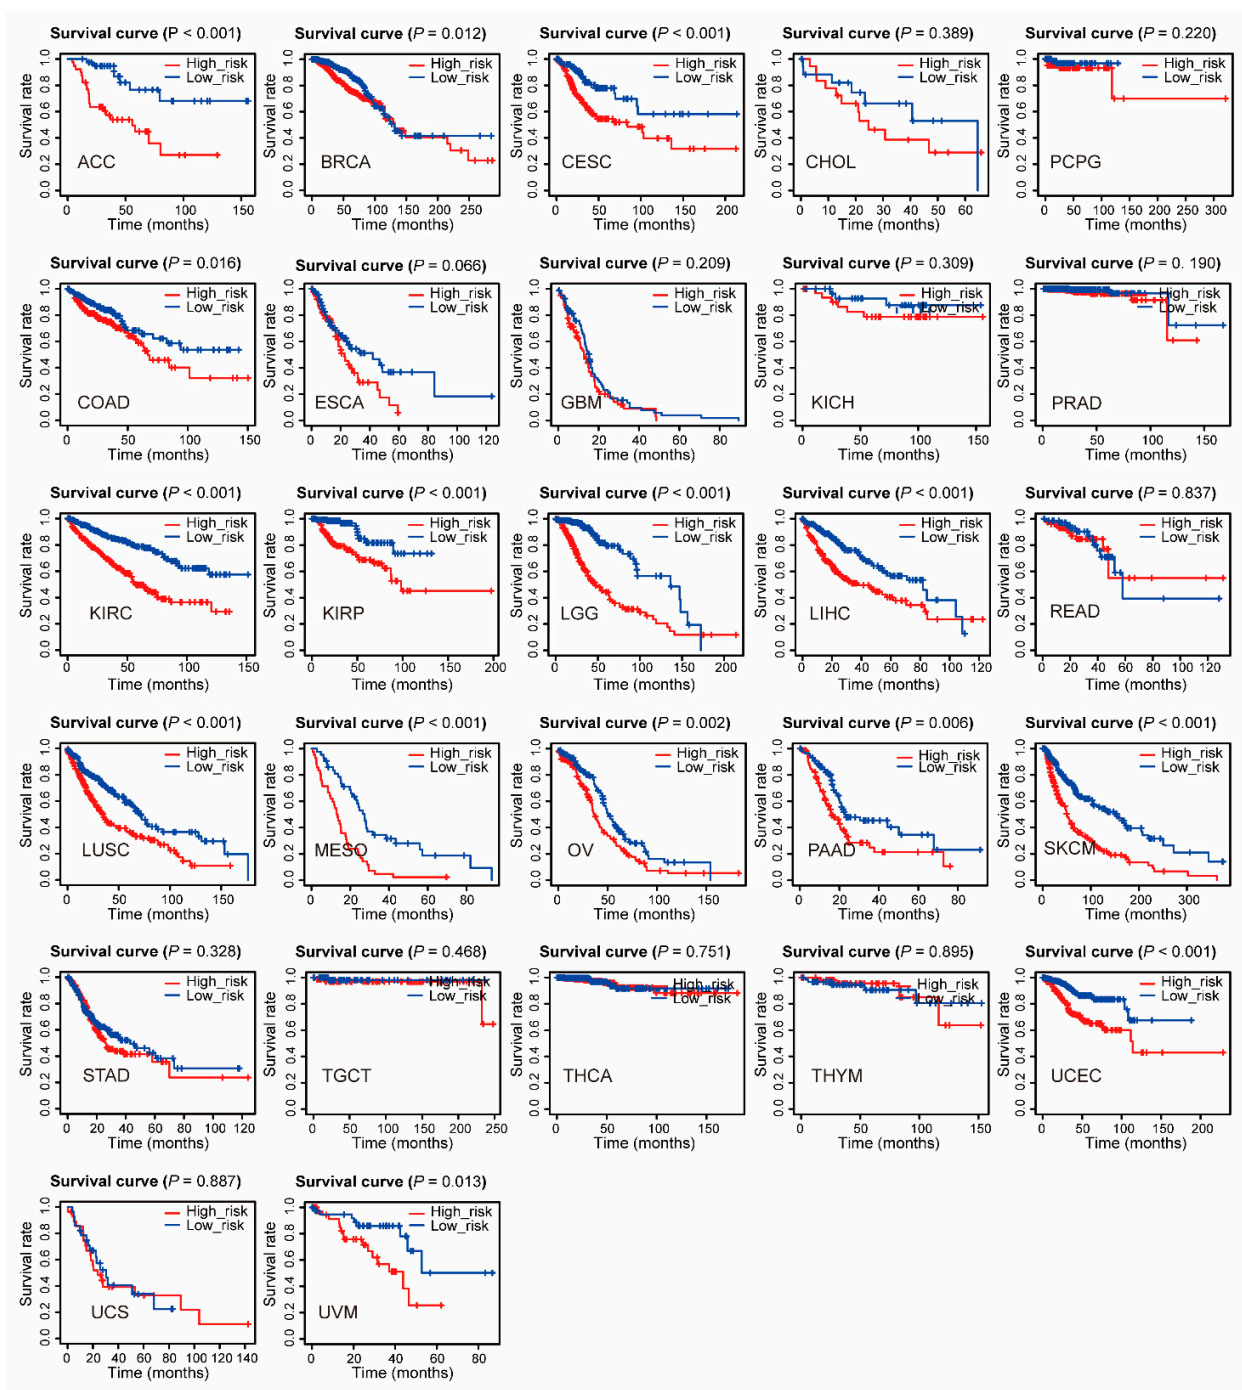

**Supplementary Figure S3.** Survival analysis of high- and low-risk patients in different human cancers. Abbreviations: ACC, adrenocortical carcinoma; BRCA, breast invasive carcinoma; CESC, cervical squamous cell carcinoma and endocervical adenocarcinoma; CHOL, cholangiocarcinoma; PCPG, pheochromocytoma and paraganglioma; COAD, colon adenocarcinoma; ESCA, esophageal carcinoma; GBM, glioblastoma multiforme; KICH,

kidney chromophobe; PRAD, prostate adenocarcinoma; KIRC, kidney renal clear cell carcinoma; KIRP, kidney renal papillary cell carcinoma; LGG, brain lower grade glioma; LIHC, liver hepatocellular carcinoma; READ, rectum adenocarcinoma; LUSC, lung squamous cell carcinoma; MESO, mesothelioma; OV, ovarian serous cystadenocarcinoma; PAAD, pancreatic adenocarcinoma; SKCM, skin cutaneous melanoma; STAD, stomach adenocarcinoma; TCGT, testicular germ cell tumors; THCA, thyroid carcinoma; THYM, thymoma; UCEC, uterine corpus endometrial carcinoma; USC, uterine carcinosarcoma; UVM, uveal melanoma.

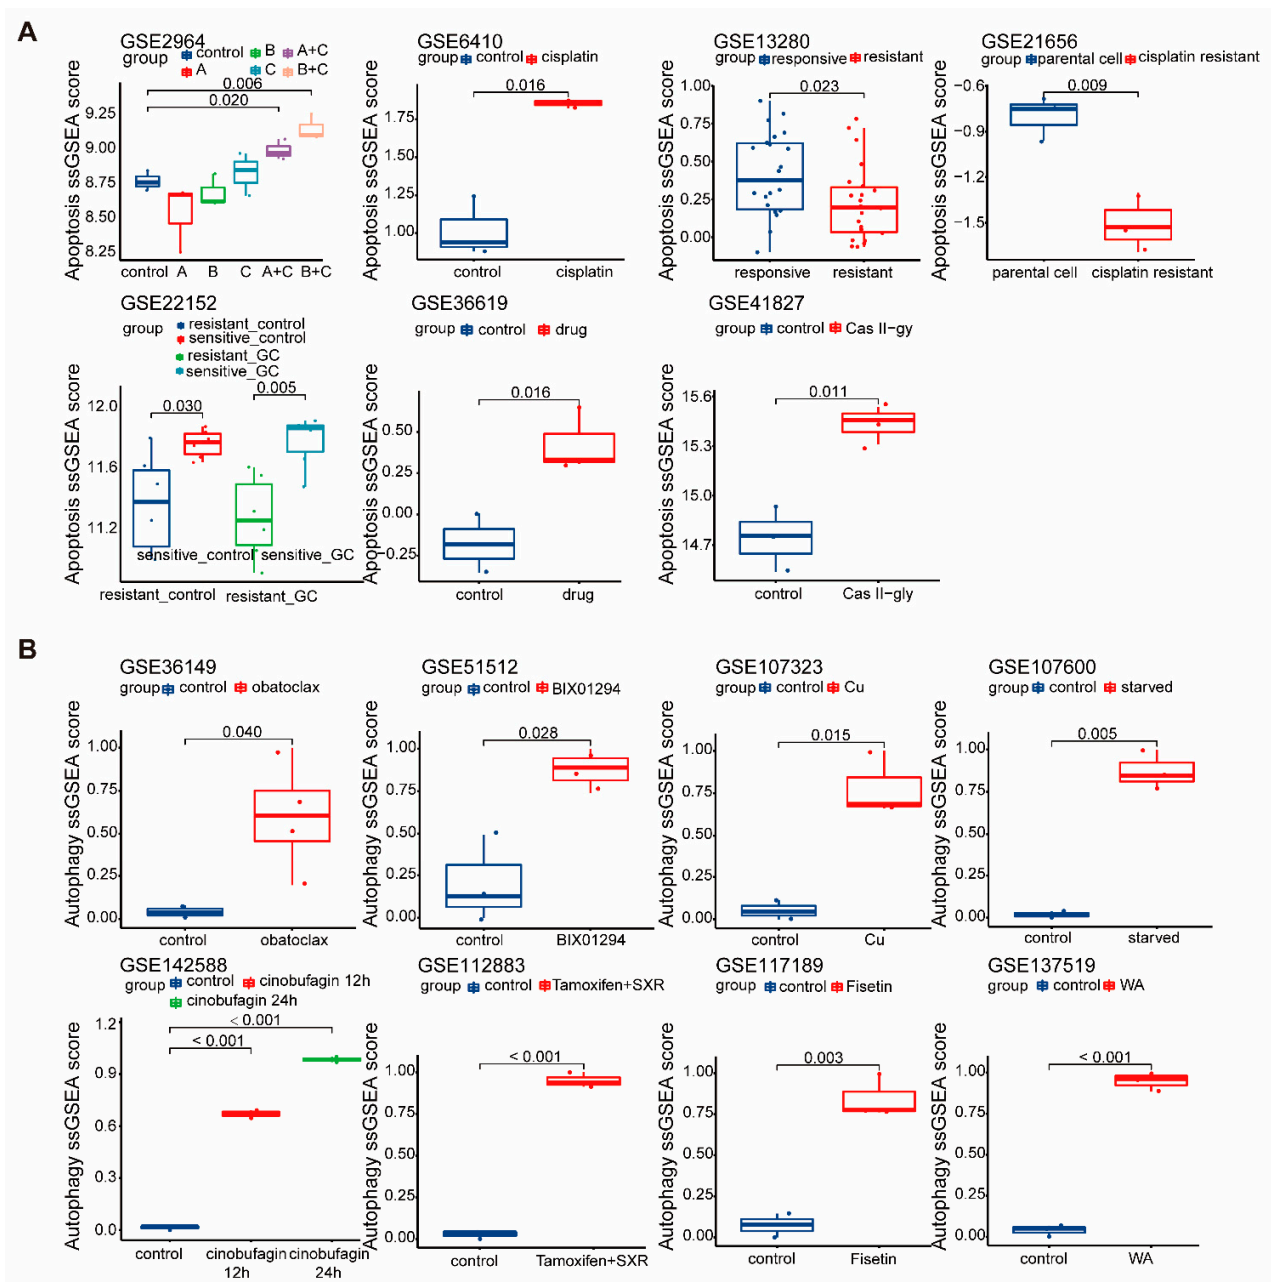

**Supplementary Figure S4.** Validating the performance of five types cell death gene signatures in differentiating death-inducing and non-death-inducing cells. A) Boxplots showed the signature of apoptosis could effectively differentiate the death-inducing and non-death-inducing cells; B) Boxplots showed the signature of autophagy could effectively differentiate the death-inducing and non-death-inducing cells.



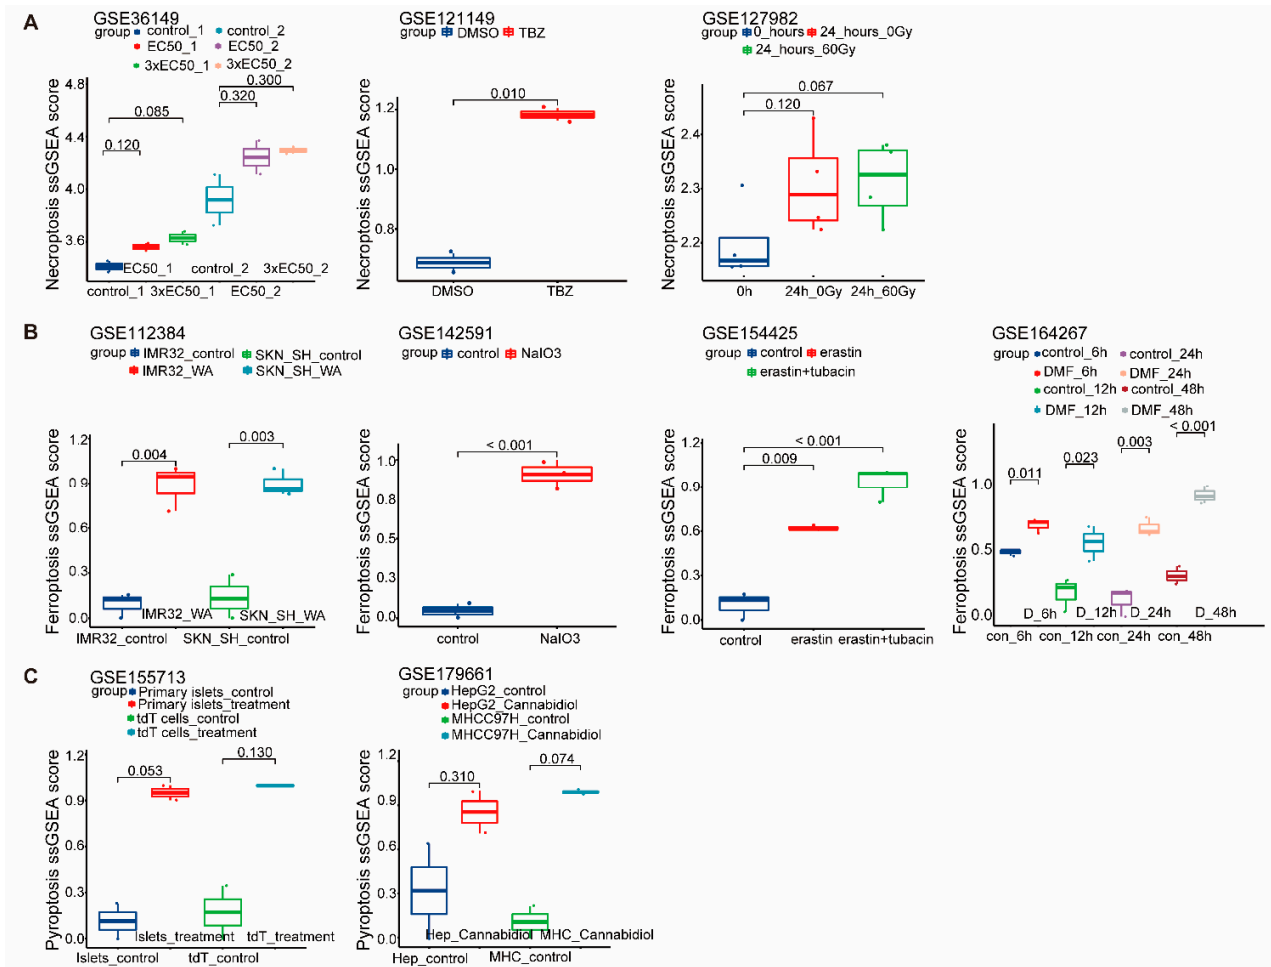

**Supplementary Figure S5.** Validating the performance of five types cell death gene signatures in differentiating death-inducing and non-death-inducing cells. A) Boxplots showed the signature of necroptosis could potentially differentiate the death-inducing and non-death-inducing cells; B) Boxplots showed the signature of ferroptosis could effectively differentiate the death-inducing and non-death-inducing cells; C) Boxplots showed the signature of pyroptosis could potentially differentiate the death-inducing and non-death-inducing cells.



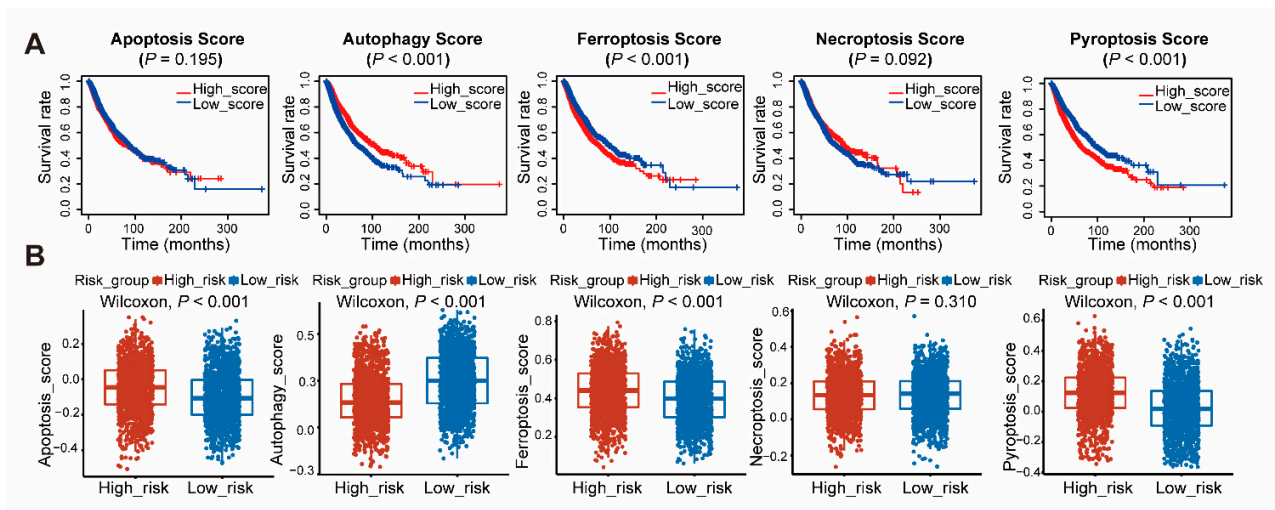

**Supplementary Figure S6.** Identifying and characterizing five types of cell death gene signatures in cancers. A) Survival analysis showed ferroptosis score and pyroptosis were unfavorable survival predictors, but autophagy score was favorable predictors in validation cohort; B) Box plots showed high-risk patients have higher score of apoptosis, ferroptosis and pyroptosis, and lower score of autophagy than low-risk patients.

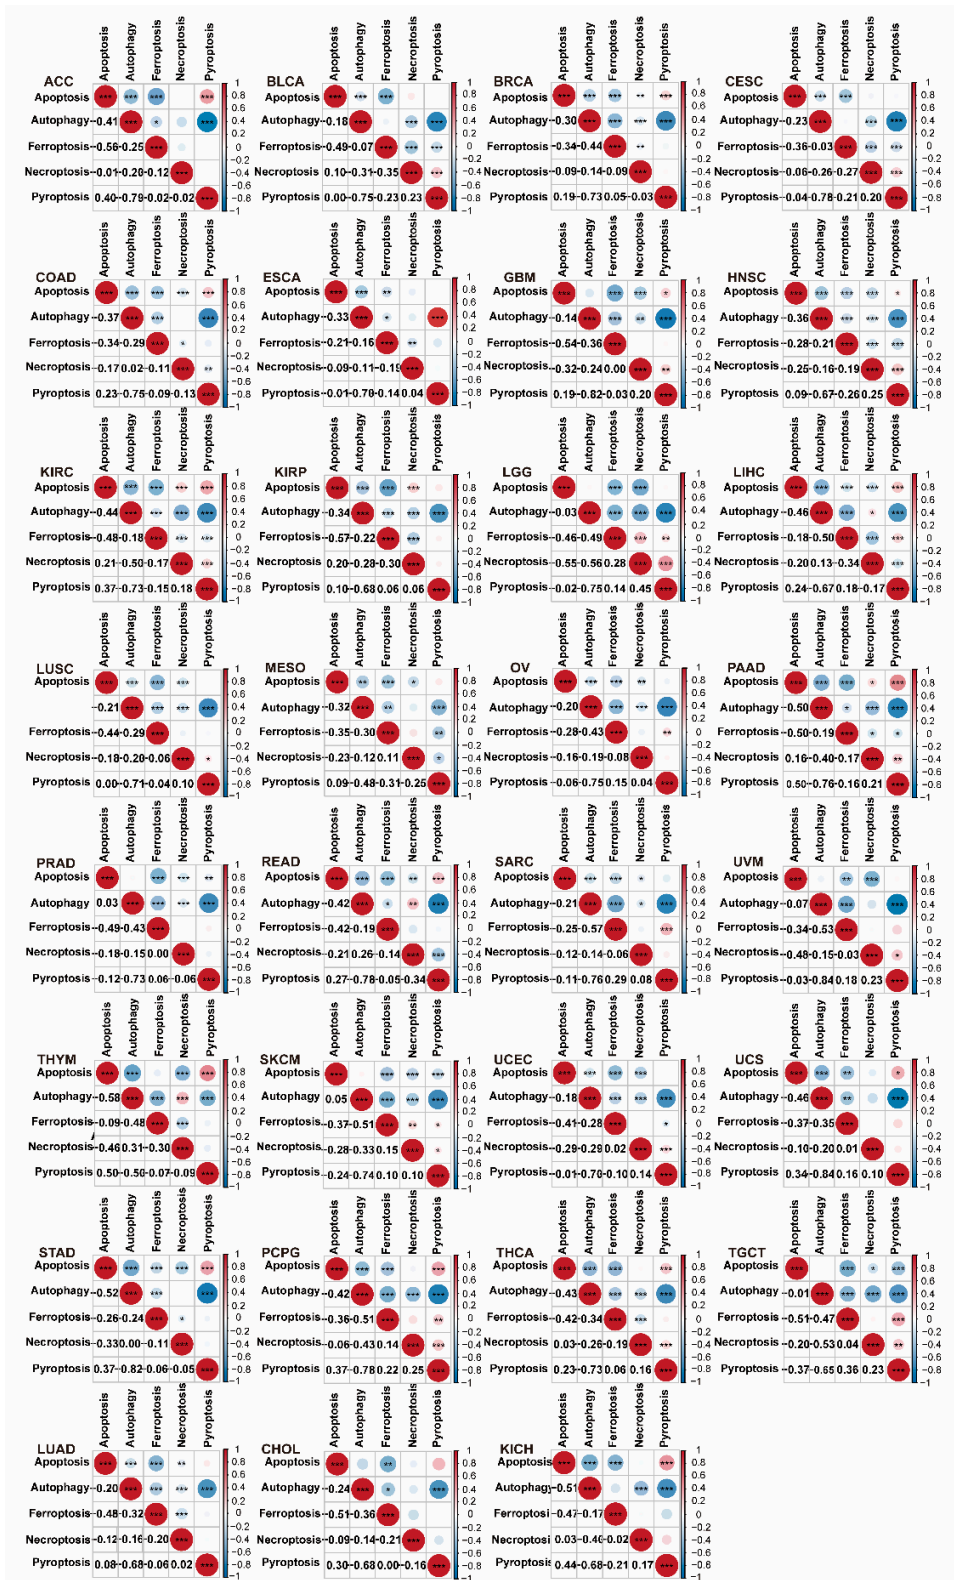

**Supplementary Figure S7.** Correlation analysis of score of five types of cell death signatures in different types of cancers. Abbreviations: ACC, adrenocortical carcinoma; BRCA, breast invasive carcinoma; CESC, cervical squamous cell carcinoma and endocervical adenocarcinoma; CHOL, cholangiocarcinoma; PCPG, pheochromocytoma and paraganglioma; COAD, colon adenocarcinoma; ESCA, esophageal carcinoma; GBM, glioblastoma multiforme; KICH, kidney chromophobe; PRAD, prostate adenocarcinoma; KIRC, kidney renal clear cell carcinoma; KIRP, kidney renal papillary cell carcinoma; LGG, brain lower grade glioma; LIHC, liver hepatocellular carcinoma; READ, rectum adenocarcinoma; LUSC, lung squamous cell carcinoma; MESO, mesothelioma; OV, ovarian serous cystadenocarcinoma; PAAD, pancreatic adenocarcinoma; SKCM, skin cutaneous melanoma; STAD, stomach adenocarcinoma; TCGT, testicular germ cell tumors; THCA, thyroid carcinoma; THYM, thymoma; UCEC, uterine corpus endometrial carcinoma; USC, uterine carcinosarcoma; UVM, uveal melanoma. \*:  $P < 0.05$ , \*\*:  $P < 0.01$ , \*\*\*:  $P < 0.001$ .

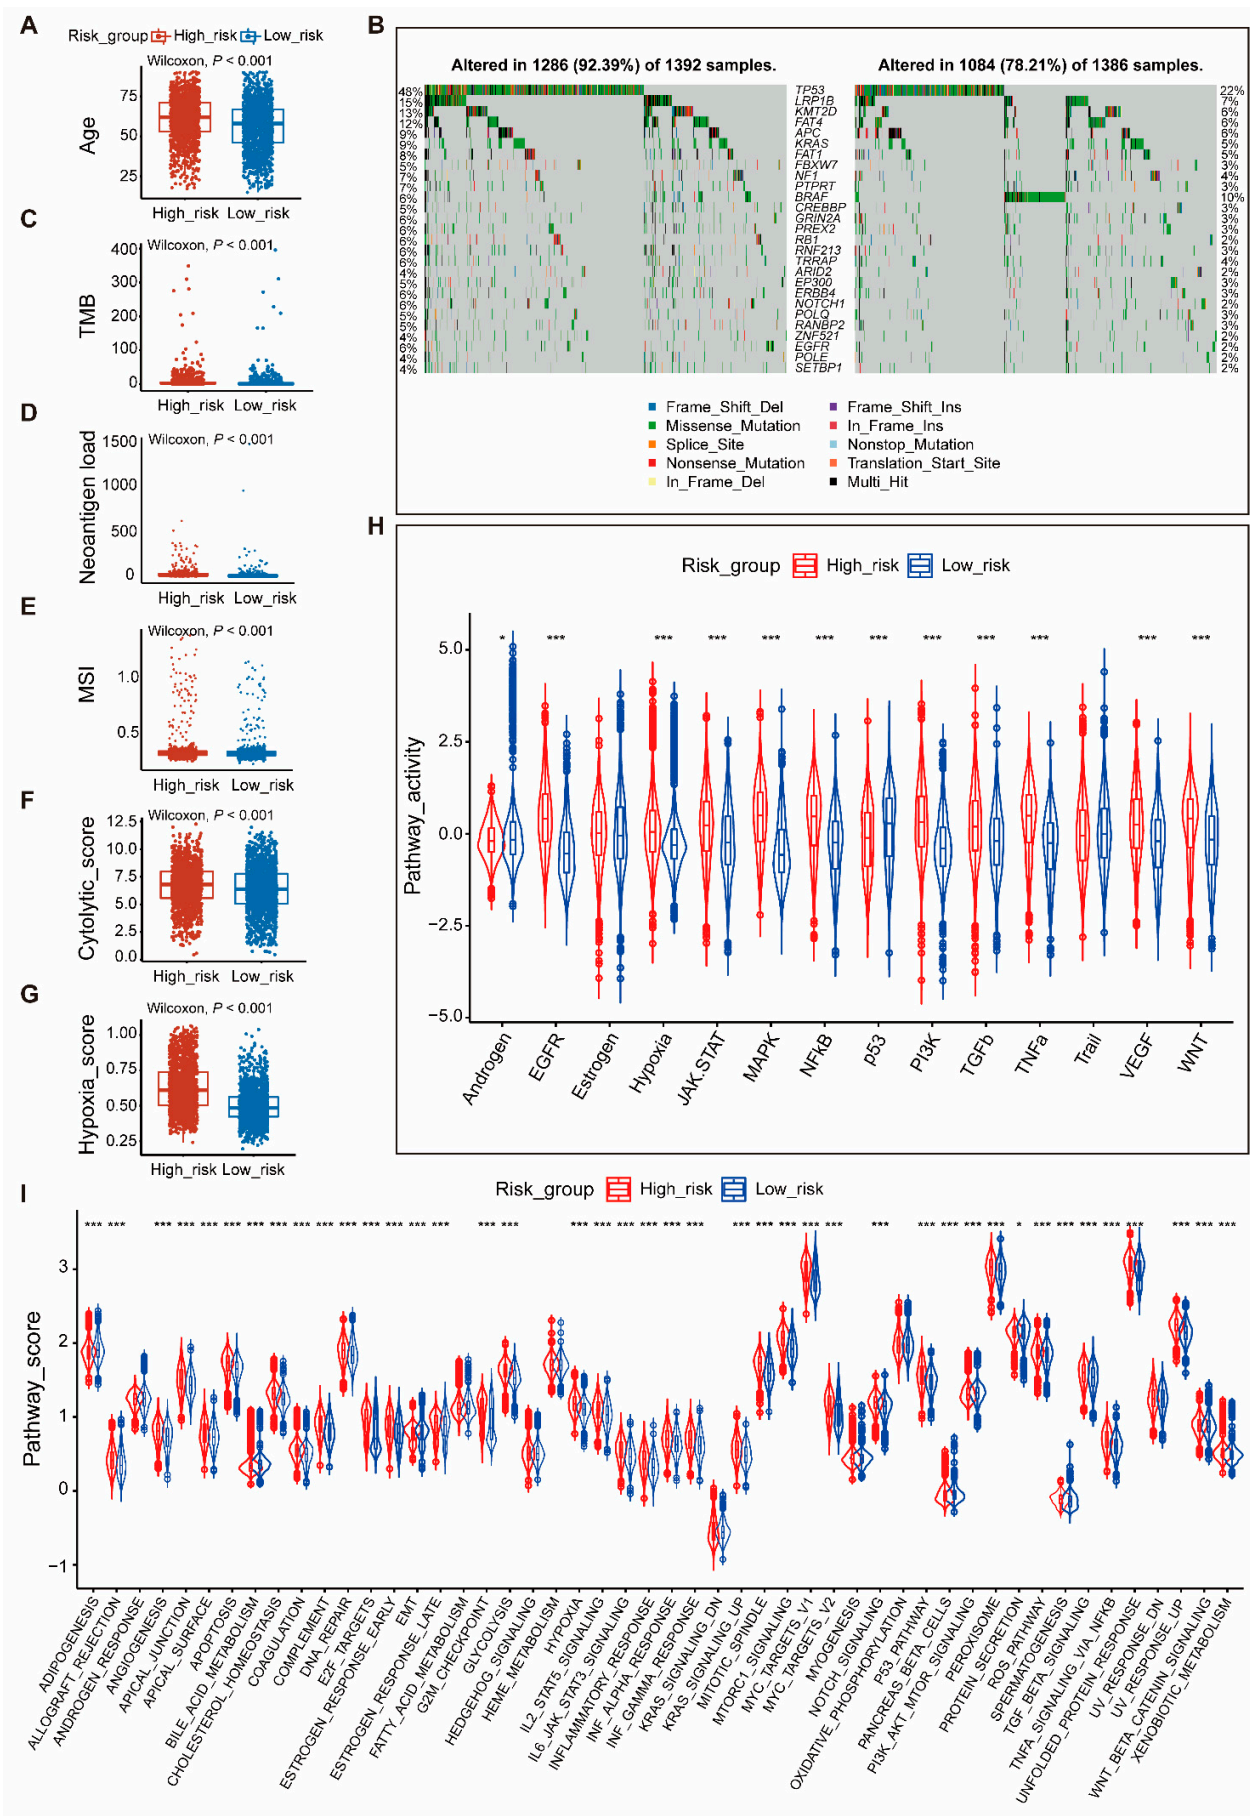

**Supplementary Figure S8.** Comparing the clinical and molecular features between high- and low- risk patients in validation cohort. A) Box plot showed high-risk patients have older-age distribution than low-risk patients; B) Analysis of the mutation profiles of the fifty most commonly mutated genes in human cancers showed 23 genes had significantly different mutation frequency between low-risk and high-risk patients ; C) Box plot showed high-risk patients have higher TMB than low-risk patients; D) Box plot showed high-risk patients have higher cytolytic score than low-risk patients; E) Box plot showed high-risk patients have higher hypoxia score than low-risk patients; F) Relative signaling pathway activity scores in high- and low- risk patients measured from RNA-seq by progeny; G) Violin plot showed the ssGSEA score of fifty pathways of cancer hallmarks in high- and low-risk patients. Abbreviations: TMB, tumor mutation burden. \*:  $P < 0.05$ , \*\*:  $P < 0.01$ , \*\*\*:  $P < 0.001$ .

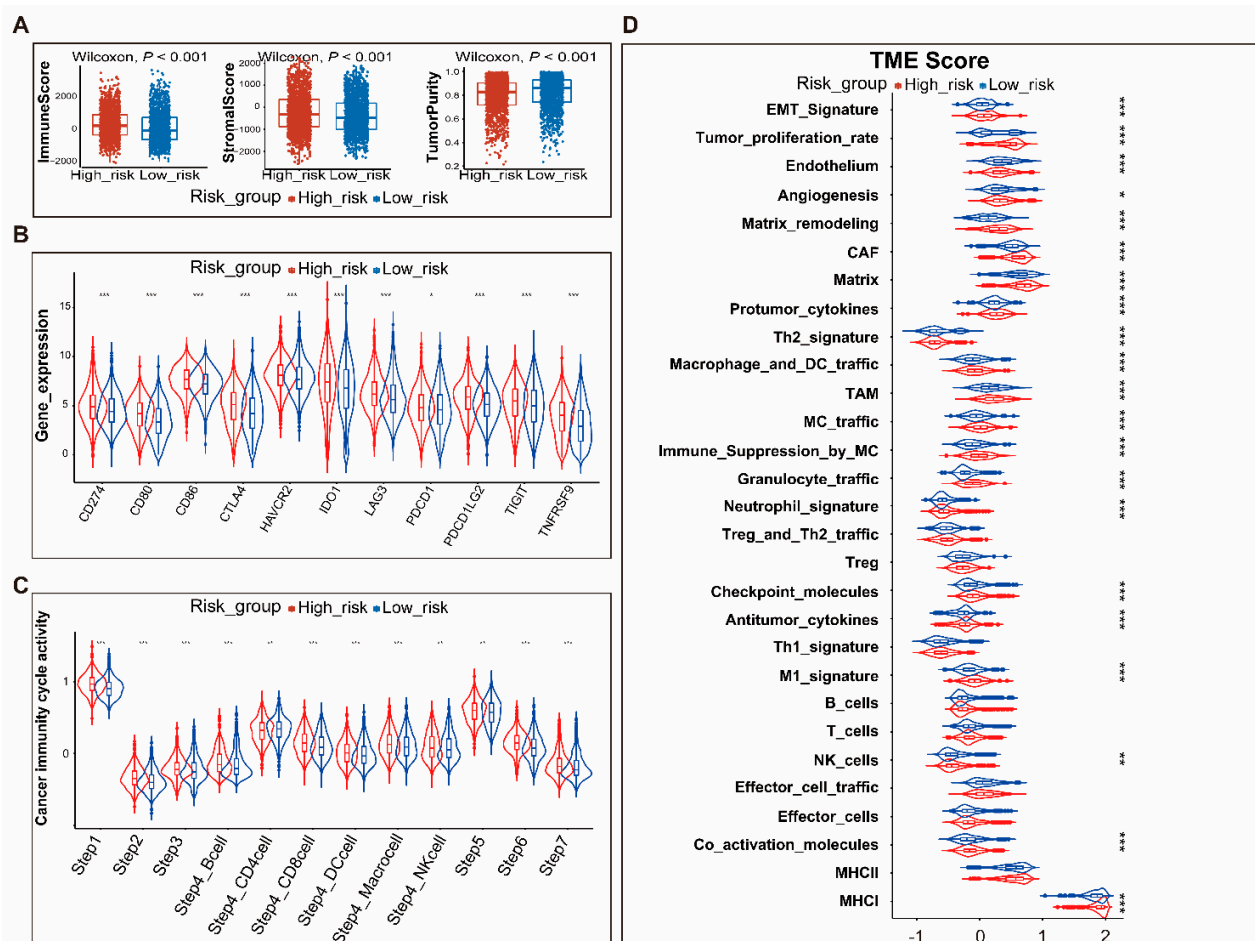

**Supplementary Figure S9.** Comparing the differences of tumor microenvironment between high- and low- risk patients in validation cohort. A) Box plots showed high-risk patients have higher “ImmuneScore” and “StromaScore”, and lower “TumorPurity” than low-risk patients; B) The violin plot showed the expression of immune checkpoint genes in high- and low-risk patients; C) The relative activity of seven-step of cancer immunity cycle in high- and low-risk patients.; D) The violin plot showed the ssGSEA score of 29 components of tumor microenvironment in high- and low-risk patients. Abbreviations: CAF, cancer associated fibroblasts; TAM, tumor associated macrophages; MC, myeloid cells. \*:  $P < 0.05$ , \*\*:  $P < 0.01$ , \*\*\*:  $P < 0.001$ .



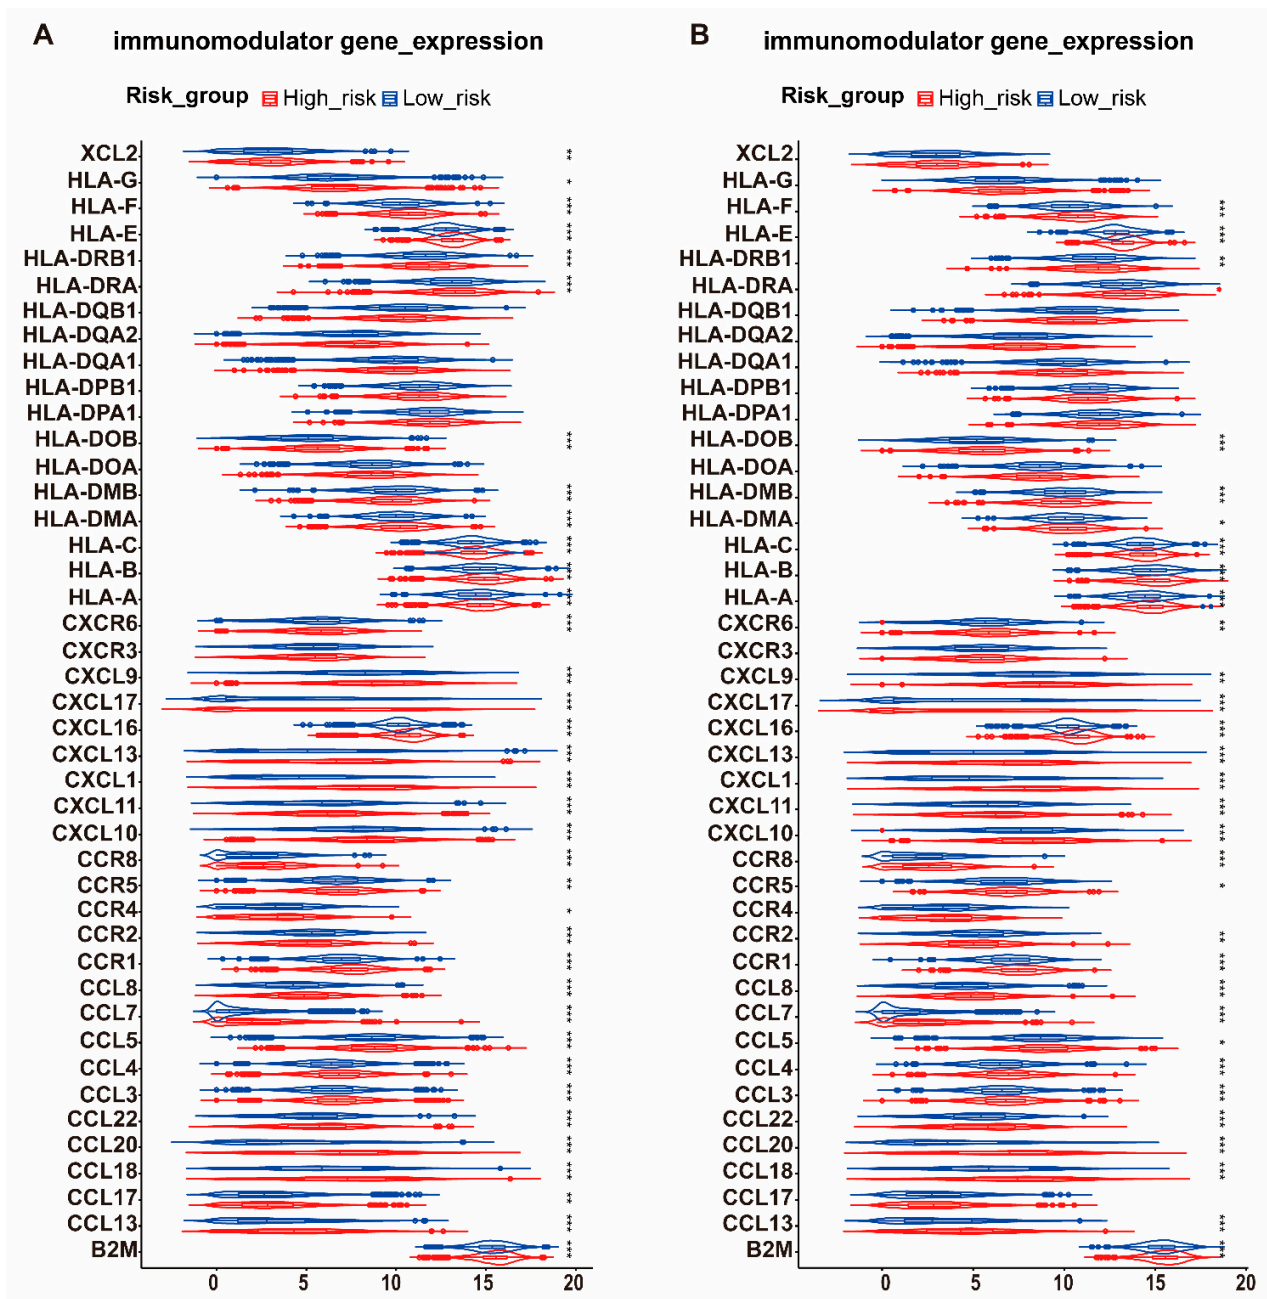

**Supplementary Figure S10.** The expression of immune-related genes in high- and low-risk patients. A) The expression of immune-related genes in high- and low-risk patients in training cohort; B) The expression of immune-related genes in high- and low-risk patients in validation cohort. \*:  $P < 0.05$ , \*\*:  $P < 0.01$ , \*\*\*:  $P < 0.001$ .



## 1.2 Supplementary Table

**Supplementary Table S1. Univariate Cox regression analysis for overall survival in training cohort**

| Gene    | HR   | HR.95 CI Lower | HR.95 CI Upper | P value |
|---------|------|----------------|----------------|---------|
| BIRC5   | 1.21 | 1.18           | 1.24           | 0.000   |
| PSMD2   | 1.58 | 1.49           | 1.67           | 0.000   |
| TFRC    | 1.24 | 1.21           | 1.28           | 0.000   |
| IL1A    | 1.12 | 1.1            | 1.13           | 0.000   |
| PSMD14  | 1.78 | 1.65           | 1.91           | 0.000   |
| CLSPN   | 1.19 | 1.17           | 1.22           | 0.000   |
| BCL2    | 0.83 | 0.81           | 0.85           | 0.000   |
| TUBA1B  | 1.51 | 1.42           | 1.59           | 0.000   |
| SLC7A11 | 1.15 | 1.13           | 1.18           | 0.000   |
| PSMA7   | 1.55 | 1.46           | 1.65           | 0.000   |
| BAK1    | 1.4  | 1.33           | 1.46           | 0.000   |
| PSMB2   | 1.64 | 1.53           | 1.76           | 0.000   |
| CASP4   | 1.3  | 1.25           | 1.35           | 0.000   |
| ACTB    | 1.6  | 1.49           | 1.71           | 0.000   |
| PIK3R3  | 0.79 | 0.77           | 0.82           | 0.000   |
| NRAS    | 1.44 | 1.37           | 1.53           | 0.000   |
| PYGL    | 1.19 | 1.16           | 1.22           | 0.000   |
| PLEC    | 1.34 | 1.29           | 1.41           | 0.000   |

|          |      |      |      |       |
|----------|------|------|------|-------|
| LMNB1    | 1.22 | 1.18 | 1.26 | 0.000 |
| PSMD11   | 1.46 | 1.37 | 1.54 | 0.000 |
| STEAP3   | 1.21 | 1.18 | 1.25 | 0.000 |
| LMNB2    | 1.29 | 1.24 | 1.35 | 0.000 |
| TUBA1C   | 1.24 | 1.19 | 1.28 | 0.000 |
| E2F1     | 1.22 | 1.18 | 1.26 | 0.000 |
| PSMD7    | 1.59 | 1.47 | 1.71 | 0.000 |
| DYNLL1   | 1.58 | 1.46 | 1.7  | 0.000 |
| PSMC2    | 1.66 | 1.53 | 1.8  | 0.000 |
| YWHAG    | 1.48 | 1.38 | 1.58 | 0.000 |
| IL1B     | 1.13 | 1.11 | 1.15 | 0.000 |
| BID      | 1.31 | 1.25 | 1.37 | 0.000 |
| TNFRSF1A | 1.43 | 1.34 | 1.52 | 0.000 |
| TUBA3D   | 0.87 | 0.85 | 0.89 | 0.000 |
| PGAM5    | 1.37 | 1.3  | 1.45 | 0.000 |
| TNFRSF21 | 1.19 | 1.15 | 1.23 | 0.000 |
| TUBB6    | 1.21 | 1.17 | 1.26 | 0.000 |
| TUBB2A   | 1.15 | 1.12 | 1.18 | 0.000 |
| PSMD1    | 1.56 | 1.44 | 1.69 | 0.000 |
| TUBB3    | 1.14 | 1.11 | 1.17 | 0.000 |
| IFNAR2   | 1.36 | 1.29 | 1.44 | 0.000 |
| OMA1     | 0.75 | 0.71 | 0.79 | 0.000 |

## Supplementary Material

|         |      |      |      |       |
|---------|------|------|------|-------|
| MYC     | 1.17 | 1.14 | 1.21 | 0.000 |
| PSMA1   | 1.58 | 1.45 | 1.72 | 0.000 |
| TRAF3   | 1.37 | 1.29 | 1.46 | 0.000 |
| YWHAZ   | 1.33 | 1.26 | 1.41 | 0.000 |
| PSMC4   | 1.42 | 1.33 | 1.52 | 0.000 |
| USP30   | 0.7  | 0.66 | 0.75 | 0.000 |
| PSME3   | 1.52 | 1.4  | 1.65 | 0.000 |
| IFT88   | 0.79 | 0.75 | 0.83 | 0.000 |
| PPIA    | 1.43 | 1.34 | 1.54 | 0.000 |
| SATB1   | 0.87 | 0.85 | 0.89 | 0.000 |
| FADD    | 1.3  | 1.23 | 1.36 | 0.000 |
| STAT5B  | 0.73 | 0.69 | 0.78 | 0.000 |
| TUBA3E  | 0.88 | 0.86 | 0.9  | 0.000 |
| CASP1   | 1.16 | 1.13 | 1.19 | 0.000 |
| CASP5   | 1.12 | 1.09 | 1.14 | 0.000 |
| TFDP1   | 1.3  | 1.23 | 1.37 | 0.000 |
| PLA2G4E | 1.08 | 1.06 | 1.1  | 0.000 |
| ITPR1   | 0.87 | 0.85 | 0.9  | 0.000 |
| CAPN2   | 1.29 | 1.23 | 1.36 | 0.000 |
| PSMD12  | 1.37 | 1.29 | 1.46 | 0.000 |
| EIF2AK2 | 1.26 | 1.2  | 1.32 | 0.000 |

|          |      |      |      |       |
|----------|------|------|------|-------|
| CASP3    | 1.37 | 1.28 | 1.46 | 0.000 |
| SLC25A5  | 1.25 | 1.2  | 1.31 | 0.000 |
| YWHAQ    | 1.42 | 1.32 | 1.53 | 0.000 |
| CAMK2B   | 0.93 | 0.92 | 0.94 | 0.000 |
| PLA2G4A  | 1.11 | 1.09 | 1.14 | 0.000 |
| UBC      | 1.45 | 1.34 | 1.56 | 0.000 |
| IGF1R    | 0.88 | 0.86 | 0.91 | 0.000 |
| ATG2B    | 0.75 | 0.71 | 0.8  | 0.000 |
| PSMA5    | 1.35 | 1.27 | 1.44 | 0.000 |
| PSMA2    | 1.4  | 1.3  | 1.5  | 0.000 |
| PPP1R13B | 0.81 | 0.77 | 0.84 | 0.000 |
| FTL      | 1.19 | 1.15 | 1.24 | 0.000 |
| LY96     | 1.14 | 1.11 | 1.17 | 0.000 |
| CAMK2A   | 1.07 | 1.06 | 1.09 | 0.000 |
| VDAC1    | 1.35 | 1.26 | 1.44 | 0.000 |
| IL18     | 1.12 | 1.09 | 1.15 | 0.000 |
| PPP3R1   | 1.44 | 1.33 | 1.57 | 0.000 |
| GCLM     | 1.17 | 1.13 | 1.21 | 0.000 |
| PAK2     | 1.41 | 1.3  | 1.52 | 0.000 |
| CTSO     | 0.85 | 0.82 | 0.88 | 0.000 |
| DYNLL2   | 0.79 | 0.75 | 0.83 | 0.000 |
| EIF2S1   | 1.41 | 1.31 | 1.53 | 0.000 |

# Supplementary Material

|         |      |      |      |       |
|---------|------|------|------|-------|
| CTSC    | 1.14 | 1.11 | 1.17 | 0.000 |
| STAT2   | 1.29 | 1.22 | 1.37 | 0.000 |
| CYCS    | 1.25 | 1.18 | 1.31 | 0.000 |
| YWHAB   | 1.43 | 1.32 | 1.56 | 0.000 |
| DAPK2   | 0.9  | 0.88 | 0.92 | 0.000 |
| GPX4    | 0.8  | 0.76 | 0.84 | 0.000 |
| AVEN    | 1.29 | 1.22 | 1.37 | 0.000 |
| NBR1    | 0.74 | 0.69 | 0.79 | 0.000 |
| IGBP1   | 0.74 | 0.69 | 0.8  | 0.000 |
| RRAGC   | 1.23 | 1.17 | 1.29 | 0.000 |
| PLIN3   | 1.26 | 1.19 | 1.33 | 0.000 |
| TNFAIP3 | 1.15 | 1.11 | 1.19 | 0.000 |
| GABARAP | 0.76 | 0.71 | 0.81 | 0.000 |
| PSMF1   | 1.52 | 1.38 | 1.68 | 0.000 |
| RRAGB   | 0.81 | 0.77 | 0.85 | 0.000 |
| ATG9A   | 1.42 | 1.3  | 1.54 | 0.000 |
| TOMM5   | 1.29 | 1.21 | 1.37 | 0.000 |
| ATG12   | 1.44 | 1.32 | 1.58 | 0.000 |
| LMNA    | 1.19 | 1.14 | 1.24 | 0.000 |
| GADD45A | 1.17 | 1.13 | 1.22 | 0.000 |
| MAP3K1  | 0.85 | 0.82 | 0.89 | 0.000 |

|           |      |      |      |       |
|-----------|------|------|------|-------|
| RNASE1    | 1.12 | 1.09 | 1.15 | 0.000 |
| TSC2      | 0.75 | 0.7  | 0.8  | 0.000 |
| HELLS     | 1.12 | 1.09 | 1.15 | 0.000 |
| VPS37C    | 0.75 | 0.7  | 0.81 | 0.000 |
| CSNK2A1   | 1.36 | 1.26 | 1.46 | 0.000 |
| CP        | 1.04 | 1.03 | 1.06 | 0.000 |
| GADD45G   | 0.92 | 0.9  | 0.94 | 0.000 |
| MFN1      | 1.25 | 1.18 | 1.32 | 0.000 |
| RELA      | 1.45 | 1.32 | 1.59 | 0.000 |
| TNFRSF10B | 1.18 | 1.13 | 1.24 | 0.000 |
| BCL2A1    | 1.09 | 1.06 | 1.11 | 0.000 |
| PIK3R1    | 0.87 | 0.84 | 0.9  | 0.000 |
| PYCARD    | 1.12 | 1.09 | 1.16 | 0.000 |
| PSMB5     | 1.33 | 1.24 | 1.44 | 0.000 |
| PRKCD     | 0.87 | 0.84 | 0.9  | 0.000 |
| TOMM40    | 1.24 | 1.17 | 1.31 | 0.000 |
| UBE2V1    | 1.42 | 1.3  | 1.56 | 0.000 |
| MAPK9     | 0.76 | 0.71 | 0.82 | 0.000 |
| MAP2K1    | 1.33 | 1.23 | 1.43 | 0.000 |
| TSC1      | 0.76 | 0.71 | 0.82 | 0.000 |
| BMF       | 0.88 | 0.85 | 0.91 | 0.000 |
| PLA2G4C   | 0.91 | 0.88 | 0.93 | 0.000 |

## Supplementary Material

|          |      |      |      |       |
|----------|------|------|------|-------|
| SLC25A4  | 0.87 | 0.83 | 0.9  | 0.000 |
| CYLD     | 0.82 | 0.77 | 0.86 | 0.000 |
| IKBKKG   | 1.26 | 1.19 | 1.34 | 0.000 |
| DSG1     | 1.05 | 1.03 | 1.06 | 0.000 |
| CD14     | 1.11 | 1.08 | 1.15 | 0.000 |
| SFN      | 1.04 | 1.03 | 1.05 | 0.000 |
| PSMD8    | 1.31 | 1.22 | 1.41 | 0.000 |
| PSMB9    | 1.12 | 1.08 | 1.15 | 0.000 |
| IL3RA    | 0.88 | 0.85 | 0.91 | 0.000 |
| ITPR2    | 0.89 | 0.86 | 0.92 | 0.000 |
| IGF2     | 1.05 | 1.04 | 1.06 | 0.000 |
| AKT3     | 0.92 | 0.89 | 0.94 | 0.000 |
| KPNA1    | 1.38 | 1.26 | 1.51 | 0.000 |
| MAP2K4   | 0.79 | 0.74 | 0.84 | 0.000 |
| EEF1A1   | 0.8  | 0.76 | 0.86 | 0.000 |
| SLC39A14 | 1.12 | 1.09 | 1.16 | 0.000 |
| PIK3CA   | 1.19 | 1.13 | 1.25 | 0.000 |
| C1QBP    | 1.23 | 1.16 | 1.3  | 0.000 |
| PPP3CC   | 0.82 | 0.77 | 0.86 | 0.000 |
| HSPA8    | 1.24 | 1.17 | 1.32 | 0.000 |
| MTMR3    | 0.79 | 0.73 | 0.84 | 0.000 |



|           |      |      |      |       |
|-----------|------|------|------|-------|
| MAPT      | 0.95 | 0.94 | 0.96 | 0.000 |
| SLC3A2    | 1.19 | 1.14 | 1.25 | 0.000 |
| MCL1      | 1.25 | 1.17 | 1.34 | 0.000 |
| PSMD3     | 1.23 | 1.16 | 1.3  | 0.000 |
| CAPN1     | 1.2  | 1.14 | 1.27 | 0.000 |
| ACSL4     | 1.14 | 1.1  | 1.18 | 0.000 |
| DFFA      | 1.29 | 1.2  | 1.39 | 0.000 |
| CHMP7     | 0.75 | 0.69 | 0.82 | 0.000 |
| TUBA4A    | 1.09 | 1.07 | 1.12 | 0.000 |
| CASP10    | 1.12 | 1.09 | 1.16 | 0.000 |
| APIP      | 0.81 | 0.76 | 0.86 | 0.000 |
| STK24     | 1.23 | 1.16 | 1.31 | 0.000 |
| CASP12    | 0.88 | 0.85 | 0.92 | 0.000 |
| DSG3      | 1.03 | 1.02 | 1.04 | 0.000 |
| PRKAB2    | 1.17 | 1.12 | 1.22 | 0.000 |
| MAP1LC3B2 | 1.25 | 1.17 | 1.34 | 0.000 |
| ATG4A     | 0.8  | 0.75 | 0.86 | 0.000 |
| NCOA4     | 0.81 | 0.76 | 0.86 | 0.000 |
| APPL1     | 0.8  | 0.75 | 0.86 | 0.000 |
| PSMD4     | 1.24 | 1.16 | 1.33 | 0.000 |
| TICAM1    | 1.2  | 1.14 | 1.27 | 0.000 |
| TUBB8     | 0.9  | 0.87 | 0.93 | 0.000 |

## Supplementary Material

|         |      |      |      |       |
|---------|------|------|------|-------|
| PRNP    | 1.12 | 1.08 | 1.16 | 0.000 |
| PSMB3   | 1.2  | 1.13 | 1.27 | 0.000 |
| ACTG1   | 1.25 | 1.17 | 1.34 | 0.000 |
| NFKBIB  | 1.21 | 1.14 | 1.29 | 0.000 |
| PSMC3   | 1.29 | 1.19 | 1.39 | 0.000 |
| SMPD1   | 0.86 | 0.83 | 0.91 | 0.000 |
| CASP8   | 1.16 | 1.1  | 1.21 | 0.000 |
| DBNL    | 1.28 | 1.18 | 1.38 | 0.000 |
| HMOX1   | 1.09 | 1.06 | 1.12 | 0.000 |
| PDPK1   | 0.84 | 0.8  | 0.89 | 0.000 |
| BCL2L2  | 0.85 | 0.8  | 0.89 | 0.000 |
| SLC11A2 | 0.83 | 0.78 | 0.88 | 0.000 |
| KPNB1   | 1.28 | 1.18 | 1.38 | 0.000 |
| SRC     | 1.17 | 1.11 | 1.22 | 0.000 |
| TOMM20  | 0.8  | 0.75 | 0.86 | 0.000 |
| SLC25A6 | 0.86 | 0.81 | 0.9  | 0.000 |
| PRKAG2  | 0.88 | 0.84 | 0.92 | 0.000 |
| STAT1   | 1.12 | 1.08 | 1.16 | 0.000 |
| PRKAA2  | 0.95 | 0.94 | 0.97 | 0.000 |
| CHMP4B  | 1.27 | 1.17 | 1.37 | 0.000 |
| ULK2    | 0.88 | 0.85 | 0.92 | 0.000 |

|          |      |      |      |       |
|----------|------|------|------|-------|
| ATG10    | 0.81 | 0.76 | 0.87 | 0.000 |
| SLC38A9  | 1.22 | 1.14 | 1.3  | 0.000 |
| YWHAH    | 1.21 | 1.14 | 1.29 | 0.000 |
| TP73     | 1.06 | 1.04 | 1.08 | 0.000 |
| MLKL     | 1.12 | 1.08 | 1.16 | 0.000 |
| CAMK2G   | 1.16 | 1.1  | 1.22 | 0.000 |
| NFKBIE   | 1.15 | 1.1  | 1.21 | 0.000 |
| GLUD1    | 0.86 | 0.82 | 0.91 | 0.000 |
| GCLC     | 1.11 | 1.07 | 1.15 | 0.000 |
| PINK1    | 0.86 | 0.82 | 0.91 | 0.000 |
| RBCK1    | 1.21 | 1.13 | 1.29 | 0.000 |
| AMBRA1   | 0.78 | 0.72 | 0.85 | 0.000 |
| ADD1     | 0.8  | 0.74 | 0.87 | 0.000 |
| UACA     | 0.89 | 0.85 | 0.93 | 0.000 |
| TUBB2B   | 1.04 | 1.03 | 1.05 | 0.000 |
| CASP2    | 1.18 | 1.11 | 1.25 | 0.000 |
| XIAP     | 0.82 | 0.76 | 0.88 | 0.000 |
| PSMA6    | 1.19 | 1.12 | 1.26 | 0.000 |
| MAP1LC3C | 1.07 | 1.04 | 1.09 | 0.000 |
| IRF3     | 1.17 | 1.11 | 1.24 | 0.000 |
| PSMD13   | 1.24 | 1.15 | 1.34 | 0.000 |
| GFAP     | 1.03 | 1.02 | 1.04 | 0.000 |

## Supplementary Material

|           |      |      |      |       |
|-----------|------|------|------|-------|
| TUBA1A    | 1.09 | 1.06 | 1.12 | 0.000 |
| PLA2G4F   | 0.97 | 0.95 | 0.98 | 0.000 |
| MAPK10    | 0.95 | 0.93 | 0.97 | 0.000 |
| VDAC2     | 1.21 | 1.13 | 1.3  | 0.000 |
| IRF6      | 0.96 | 0.95 | 0.98 | 0.000 |
| TNFRSF10A | 1.08 | 1.05 | 1.11 | 0.000 |
| TP53AIP1  | 1.05 | 1.03 | 1.07 | 0.000 |
| DYNC1LI1  | 0.8  | 0.73 | 0.87 | 0.000 |
| NMT1      | 1.32 | 1.19 | 1.47 | 0.000 |
| PARP1     | 1.16 | 1.1  | 1.23 | 0.000 |
| BIRC2     | 1.19 | 1.11 | 1.27 | 0.000 |
| GABARAPL1 | 0.91 | 0.88 | 0.94 | 0.000 |
| BMX       | 0.94 | 0.92 | 0.96 | 0.000 |
| CFLAR     | 1.14 | 1.08 | 1.2  | 0.000 |
| PSMA4     | 1.2  | 1.12 | 1.28 | 0.000 |
| CDKN2A    | 1.04 | 1.03 | 1.06 | 0.000 |
| IRF5      | 1.1  | 1.06 | 1.14 | 0.000 |
| MLST8     | 0.84 | 0.78 | 0.9  | 0.000 |
| TNFRSF25  | 1.07 | 1.04 | 1.1  | 0.000 |
| CTSF      | 0.93 | 0.9  | 0.96 | 0.000 |
| SLC40A1   | 0.94 | 0.92 | 0.96 | 0.000 |

|               |      |      |      |       |
|---------------|------|------|------|-------|
| CTSK          | 1.05 | 1.03 | 1.08 | 0.000 |
| IFNGR1        | 1.14 | 1.08 | 1.2  | 0.000 |
| SAT2          | 0.89 | 0.85 | 0.94 | 0.000 |
| HDAC6         | 0.84 | 0.79 | 0.9  | 0.000 |
| PMAIP1        | 1.06 | 1.04 | 1.09 | 0.000 |
| DCC           | 1.05 | 1.03 | 1.07 | 0.000 |
| JMJD7-PLA2G4B | 0.9  | 0.86 | 0.94 | 0.000 |
| PSMB8         | 1.1  | 1.06 | 1.15 | 0.000 |
| TUBA3C        | 0.93 | 0.9  | 0.96 | 0.000 |
| HMGB2         | 1.1  | 1.05 | 1.14 | 0.000 |
| MTMR14        | 0.82 | 0.76 | 0.89 | 0.000 |
| PSMD10        | 1.2  | 1.11 | 1.3  | 0.000 |
| OPA1          | 1.18 | 1.1  | 1.27 | 0.000 |
| PIK3CB        | 0.88 | 0.83 | 0.93 | 0.000 |
| FTMT          | 0.69 | 0.59 | 0.81 | 0.000 |
| HSF1          | 1.17 | 1.09 | 1.25 | 0.000 |
| HRAS          | 1.12 | 1.07 | 1.17 | 0.000 |
| FUNDC1        | 0.85 | 0.8  | 0.91 | 0.000 |
| GABARAPL2     | 0.86 | 0.8  | 0.92 | 0.000 |
| UNC5B         | 1.07 | 1.04 | 1.11 | 0.000 |
| KRAS          | 1.13 | 1.07 | 1.2  | 0.000 |
| STAT3         | 1.17 | 1.09 | 1.26 | 0.000 |

## Supplementary Material

|          |      |      |      |       |
|----------|------|------|------|-------|
| DAPK3    | 1.15 | 1.08 | 1.22 | 0.000 |
| HSP90AA1 | 1.14 | 1.08 | 1.21 | 0.000 |
| IRF1     | 1.08 | 1.04 | 1.12 | 0.000 |
| PSMB4    | 1.16 | 1.09 | 1.24 | 0.000 |
| ZBP1     | 1.05 | 1.03 | 1.07 | 0.000 |
| FTH1     | 1.12 | 1.06 | 1.18 | 0.000 |
| IFNAR1   | 0.84 | 0.77 | 0.91 | 0.000 |
| TNF      | 1.05 | 1.03 | 1.07 | 0.000 |
| ACIN1    | 0.83 | 0.76 | 0.91 | 0.000 |
| IRF7     | 1.07 | 1.04 | 1.11 | 0.000 |
| PARK7    | 0.84 | 0.78 | 0.91 | 0.000 |
| IFNGR2   | 1.15 | 1.07 | 1.22 | 0.000 |
| BIRC3    | 1.05 | 1.02 | 1.07 | 0.000 |
| PSMB7    | 1.15 | 1.08 | 1.24 | 0.000 |
| HTRA2    | 1.2  | 1.1  | 1.31 | 0.000 |
| ATM      | 0.9  | 0.86 | 0.95 | 0.000 |
| PARP2    | 1.15 | 1.08 | 1.22 | 0.000 |
| TRPM7    | 0.88 | 0.83 | 0.94 | 0.000 |
| PRKAB1   | 0.89 | 0.84 | 0.94 | 0.000 |
| EIF2AK3  | 0.89 | 0.84 | 0.94 | 0.000 |
| IGF1     | 0.96 | 0.94 | 0.98 | 0.000 |

|         |      |      |      |       |
|---------|------|------|------|-------|
| CARD8   | 0.89 | 0.84 | 0.94 | 0.000 |
| TF      | 1.02 | 1.01 | 1.03 | 0.000 |
| VPS37D  | 0.95 | 0.93 | 0.97 | 0.000 |
| RRAGD   | 0.95 | 0.92 | 0.97 | 0.000 |
| RIPK3   | 1.05 | 1.03 | 1.08 | 0.000 |
| FNTA    | 1.16 | 1.08 | 1.25 | 0.000 |
| PRKAG3  | 1.07 | 1.03 | 1.1  | 0.000 |
| IFNA13  | 1.17 | 1.08 | 1.27 | 0.000 |
| STAT4   | 0.95 | 0.93 | 0.98 | 0.000 |
| TLR4    | 0.94 | 0.91 | 0.97 | 0.000 |
| OCLN    | 0.96 | 0.95 | 0.98 | 0.000 |
| RNF31   | 0.85 | 0.78 | 0.92 | 0.000 |
| UBAP1   | 1.18 | 1.08 | 1.28 | 0.000 |
| MAP3K5  | 0.94 | 0.91 | 0.97 | 0.000 |
| PRKCQ   | 0.96 | 0.94 | 0.98 | 0.000 |
| CHMP6   | 0.88 | 0.83 | 0.94 | 0.000 |
| ATG16L1 | 0.87 | 0.81 | 0.93 | 0.000 |
| CHMP4C  | 0.97 | 0.96 | 0.99 | 0.000 |
| BCAP31  | 1.14 | 1.06 | 1.22 | 0.000 |
| PSME4   | 1.12 | 1.05 | 1.18 | 0.000 |
| CHMP1B  | 1.15 | 1.07 | 1.23 | 0.000 |
| TP53BP2 | 1.11 | 1.05 | 1.18 | 0.000 |



## Supplementary Material

|        |      |      |      |       |
|--------|------|------|------|-------|
| CETN1  | 0.77 | 0.67 | 0.89 | 0.000 |
| TRADD  | 1.09 | 1.04 | 1.14 | 0.000 |
| ATG4D  | 0.9  | 0.85 | 0.95 | 0.000 |
| TUBAL3 | 1.04 | 1.02 | 1.06 | 0.000 |
| PSMB1  | 1.14 | 1.06 | 1.22 | 0.000 |
| BBC3   | 0.93 | 0.89 | 0.97 | 0.000 |
| RHEB   | 1.13 | 1.06 | 1.22 | 0.000 |
| CAMK2D | 1.09 | 1.04 | 1.15 | 0.000 |
| STAT6  | 0.93 | 0.89 | 0.97 | 0.000 |
| TRAF5  | 1.06 | 1.03 | 1.1  | 0.000 |
| DAXX   | 1.17 | 1.07 | 1.27 | 0.000 |
| CRADD  | 0.91 | 0.86 | 0.96 | 0.000 |
| CSNK2B | 1.15 | 1.06 | 1.24 | 0.000 |
| ATG9B  | 1.04 | 1.02 | 1.06 | 0.001 |
| PSMA8  | 0.92 | 0.87 | 0.96 | 0.001 |
| CYBB   | 1.05 | 1.02 | 1.07 | 0.001 |
| ACSL3  | 0.92 | 0.87 | 0.96 | 0.001 |
| VPS37B | 1.1  | 1.04 | 1.16 | 0.001 |
| JAK3   | 1.05 | 1.02 | 1.08 | 0.001 |
| AKT1S1 | 1.14 | 1.06 | 1.23 | 0.001 |
| PTPN13 | 0.96 | 0.94 | 0.99 | 0.001 |

|       |      |      |      |       |
|-------|------|------|------|-------|
| DAPK1 | 1.05 | 1.02 | 1.08 | 0.001 |
| PSMA3 | 1.13 | 1.05 | 1.21 | 0.001 |
| IFNB1 | 1.12 | 1.05 | 1.19 | 0.001 |
| RRAGA | 0.88 | 0.82 | 0.95 | 0.001 |
| PSMB6 | 1.13 | 1.05 | 1.21 | 0.001 |

---

Abbreviations: HR, hazard ratio; CI, confidential interval.
